# Supplementary material for: Identification and Characterization of Tunneling Nanotubes Involved in Human Mast Cell FcεRI-Mediated Apoptosis of Cancer Cells
Source: MDPI journal article supplement (doi:10.3390/cancers14122944), 2022-06-14
Supplement: s1 [file s1]

Supplementary Materials

# Identification and Characterization of Tunneling Nanotubes Involved in Human Mast Cell FcεRI-Mediated Apoptosis of Cancer Cells

Elnaz Ahani <sup>1</sup>, Mohammad Fereydouni <sup>2</sup>, Mona Motaghed <sup>1</sup> and Christopher L. Kepley <sup>3,\*</sup>

<sup>1</sup> Department of Nanoengineering, Joint School of Nanoscience and Nanoengineering, North Carolina Agricultural and Technical State University, Greensboro, NC 27401, USA; eahani@aggies.ncat.edu (E.A.); mmotaghed@aggies.ncat.edu (M.M.)

<sup>2</sup> Department of Nanoscience, Joint School of Nanoscience and Nanoengineering, University of North Carolina at Greensboro, Greensboro, NC 27401, USA; m\_fereyd@uncg.edu

<sup>3</sup> Department of Molecular and Cellular Sciences, Liberty University College of Osteopathic Medicine, Lynchburg, VA 24502, USA

\* Correspondence: ckepley@liberty.edu; Tel.: +1-540-808-8993

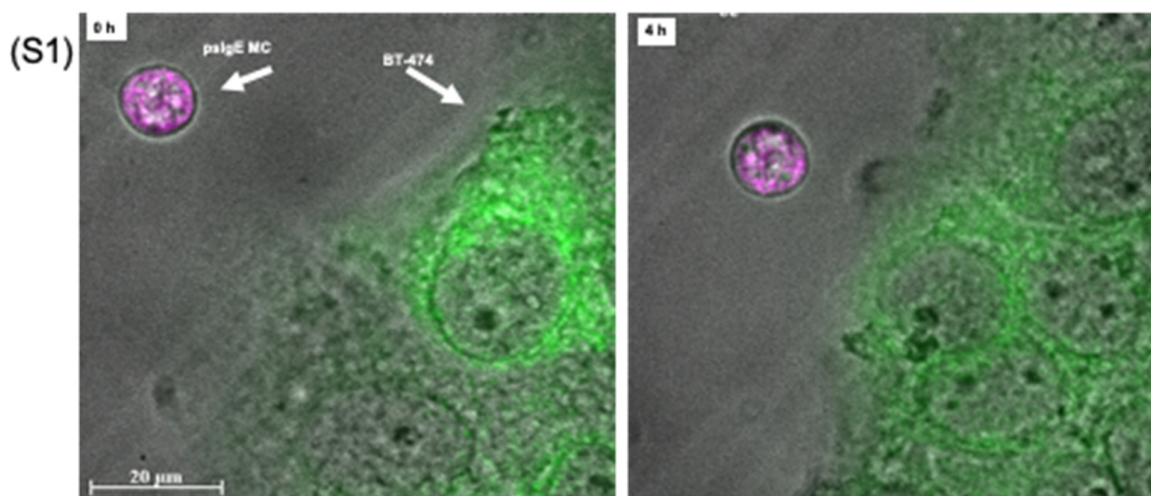

**Figure S1.** Fluorescent microscopy of psIgE MCs with BT-474 cells in a co-culture system (Control). MitoTracker™ Green-FM-labeled BT-474 (S1) were added to CellBrite®-labeled ADMC ( $1 \times 10^5$ ) sensitized with psIgE for the indicated times.

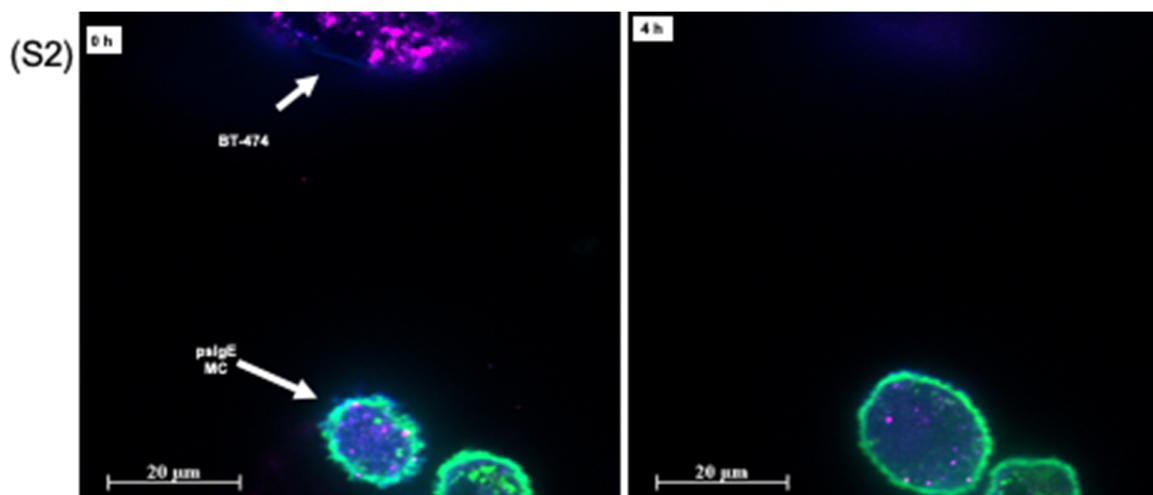

**Figure S2.** Fluorescent microscopy of psIgE MCs with SK-BR-3 cells in a co-culture system (Control). CellBrite®-labeled SK-BR-3 were added to MitoTracker™ Green-FM-labeled ADCM ( $1 \times 10^5$ ) sensitized with psIgE for the indicated times.

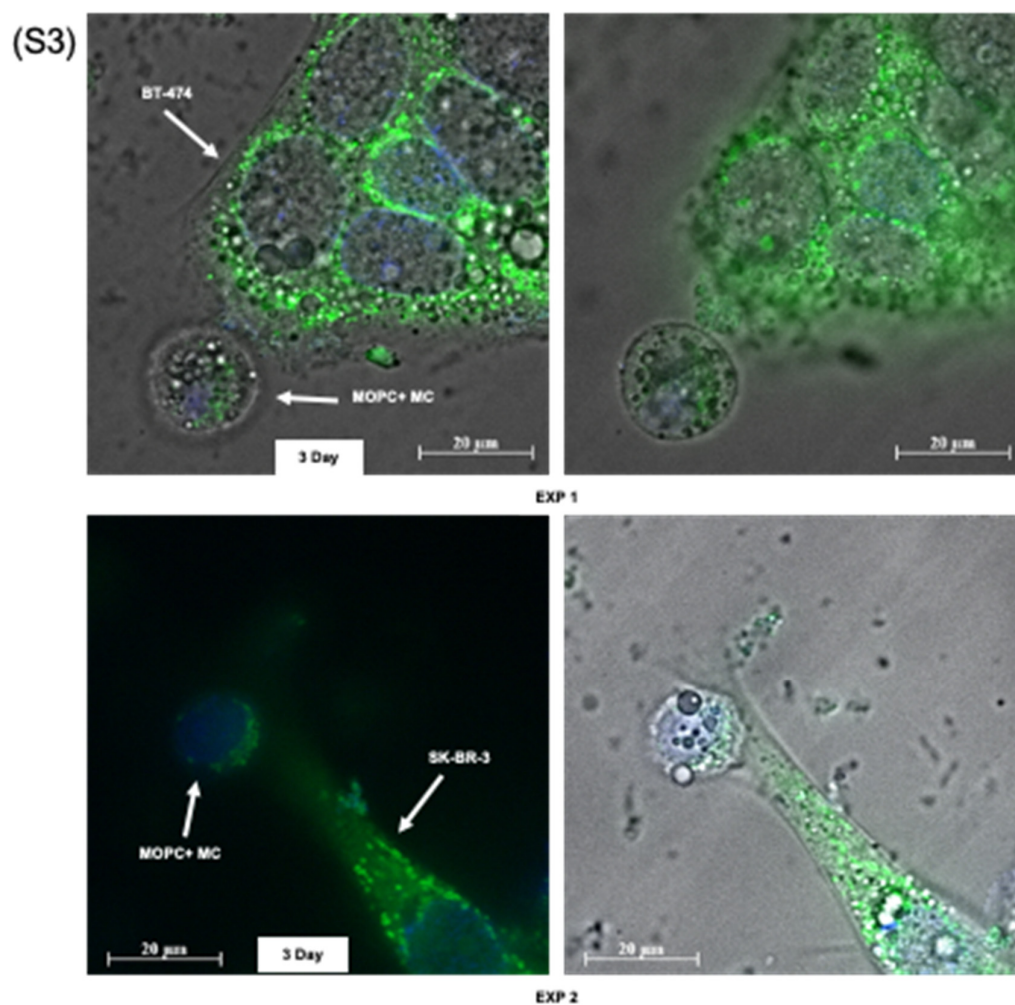

**Figure S3.** Immunohistochemistry of non-specific control (MOPC) for tryptase experiments (Control). Hoechst-stained HER2/neu-sensitized ADCM ( $1 \times 10^5$ ) were added to the MitoTracker™

Green FM-labeled BT-474 and SK-BR-3 cells for three days. Slides were fixed and labeled with MOPC followed by secondary Abs.

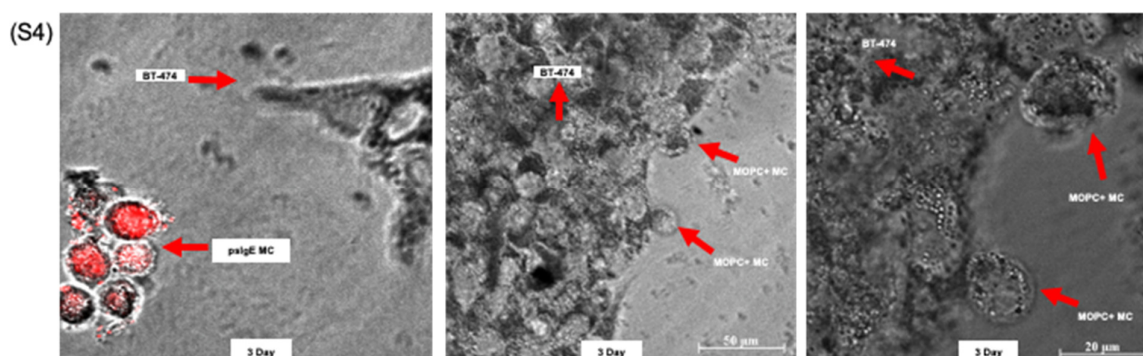

**Figure S4.** Immunohistochemistry of psIgE and non-specific control (MOPC) for anti-TNF- $\alpha$  experiments (Control). (Left) psIgE ADCMC were added to the BT-474 cells for three days. Slides were fixed and labeled with anti-TNF- $\alpha$  Ab followed by secondary Ab. (Right) HER2/neu ADCMC were added to the BT-474 cells for three days. Slides were fixed and labeled with MOPC followed by secondary Ab.

#### Legend for Videos:

Video (S1). TnT are not formed between psIgE-sensitized MCs and BT-474 cells. BT-474 cells were grown on confocal slides (50–60% confluent). The psIgE MCs were labeled with CellBrite® and were added to BT-474 cells, and a time-lapse video was recorded for 24 h by fluorescent microscopy. The results showed no or minimal interaction between MCs and BC cells.

Video (S2). Fluorescent microscopy of the interaction of MCs with BC cells. HER2/neu IgE-sensitized MCs were labeled with CellBrite® and added to BT474 cells. After co-culturing, MCs formed TnT on the cancer cells and infiltrated into the BT-474 cells. Time-lapse video was acquired for 24 h of co-culture using fluorescent microscopy.

Video (S3). MC binding to BT-474 cells involves TnT. BT-474 cells were grown on confocal slides (50–60% confluent) and were labeled with CellBrite®. MCs ( $1 \times 10^5$ ) were labeled with MitoTracker™ Green and sensitized with HER2/neu IgE. Then, after fixation, they were labeled with WGA- Alexa Fluor 488® phalloidin (as described in Materials and Methods section), and time-lapse videos were acquired for 24 h of co-culture by fluorescent microscopy.

Video (S4). MC binding to SK-BR-3 cells involves TnT. SK-BR-3 cells were labeled with CellBrite® and were added to HER2/neu IgE MCs ( $1 \times 10^5$ ) labeled with MitoTracker™ Green. Then, after fixation, they were labeled with WGA- Alexa Fluor 488® phalloidin (as described in Materials and Methods section), and time-lapse videos were acquired for 24 h of co-culture by fluorescent microscopy.

Video (S5). Formation of TnT and membrane blebs between MCs and BT-474 cells. MCs were sensitized with HER2/neu IgE and then added to BT-474 cells. Time-lapse video was acquired for 24 h of co-culture by fluorescent microscopy (in a black and white view) to show MC TnT and membrane blebs forming with cancer cells.
